# Supplementary material for: Transcriptomic Analysis and Multiple Machine Learning Approaches Identify ZDHHC20 and Its Highly Correlated Gene AK5 as Diagnostic Markers in Multiple System Atrophy
Source: Research Square preprint supplement (doi:10.21203/rs.3.rs-8711800/v1), 2026-02-13
Supplement: Supplementary file 1 [file 10648cce9d6ff3e2f2d3caf6.docx]

**Table S2.** Performance evaluation metrics of the eight machine learning algorithms.

|  | **recalla** | **precisionb** | **f1c** | **accuracyd** | **auce** |
| --- | --- | --- | --- | --- | --- |
| SVM | 0.857 | 0.800 | 0.828 | 0.821 | 0.852 |
| RF | 0.643 | 0.692 | 0.667 | 0.679 | 0.847 |
| NNET | 0.714 | 0.833 | 0.769 | 0.786 | 0.832 |
| LASSO | 0.786 | 0.846 | 0.815 | 0.821 | 0.893 |
| KNN | 0.786 | 0.786 | 0.786 | 0.786 | 0.819 |
| GLM | 0.714 | 0.667 | 0.690 | 0.679 | 0.765 |
| GBM | 0.714 | 1.000 | 0.833 | 0.857 | 0.923 |
| DT | 1.000 | 0.500 | 0.667 | 0.500 | 0.500 |

**a** Refers to the proportion of all actual positive samples that are correctly predicted as positive by the model. **b** Refers to the proportion of samples predicted as positive by the model that are actually positive. **c** The harmonic mean of precision and recall (2 * (Precision * Recall) / (Precision + Recall)), used for a comprehensive evaluation of the model's performance, especially in cases of class imbalance. **d** Refers to the proportion of correctly predicted samples (including true positives and true negatives) out of the total number of samples. **e** Refers to the Area Under the ROC (Receiver Operating Characteristic) Curve. It measures the model's overall ability to distinguish between positive and negative samples. An AUC value closer to 1 indicates better diagnostic performance.


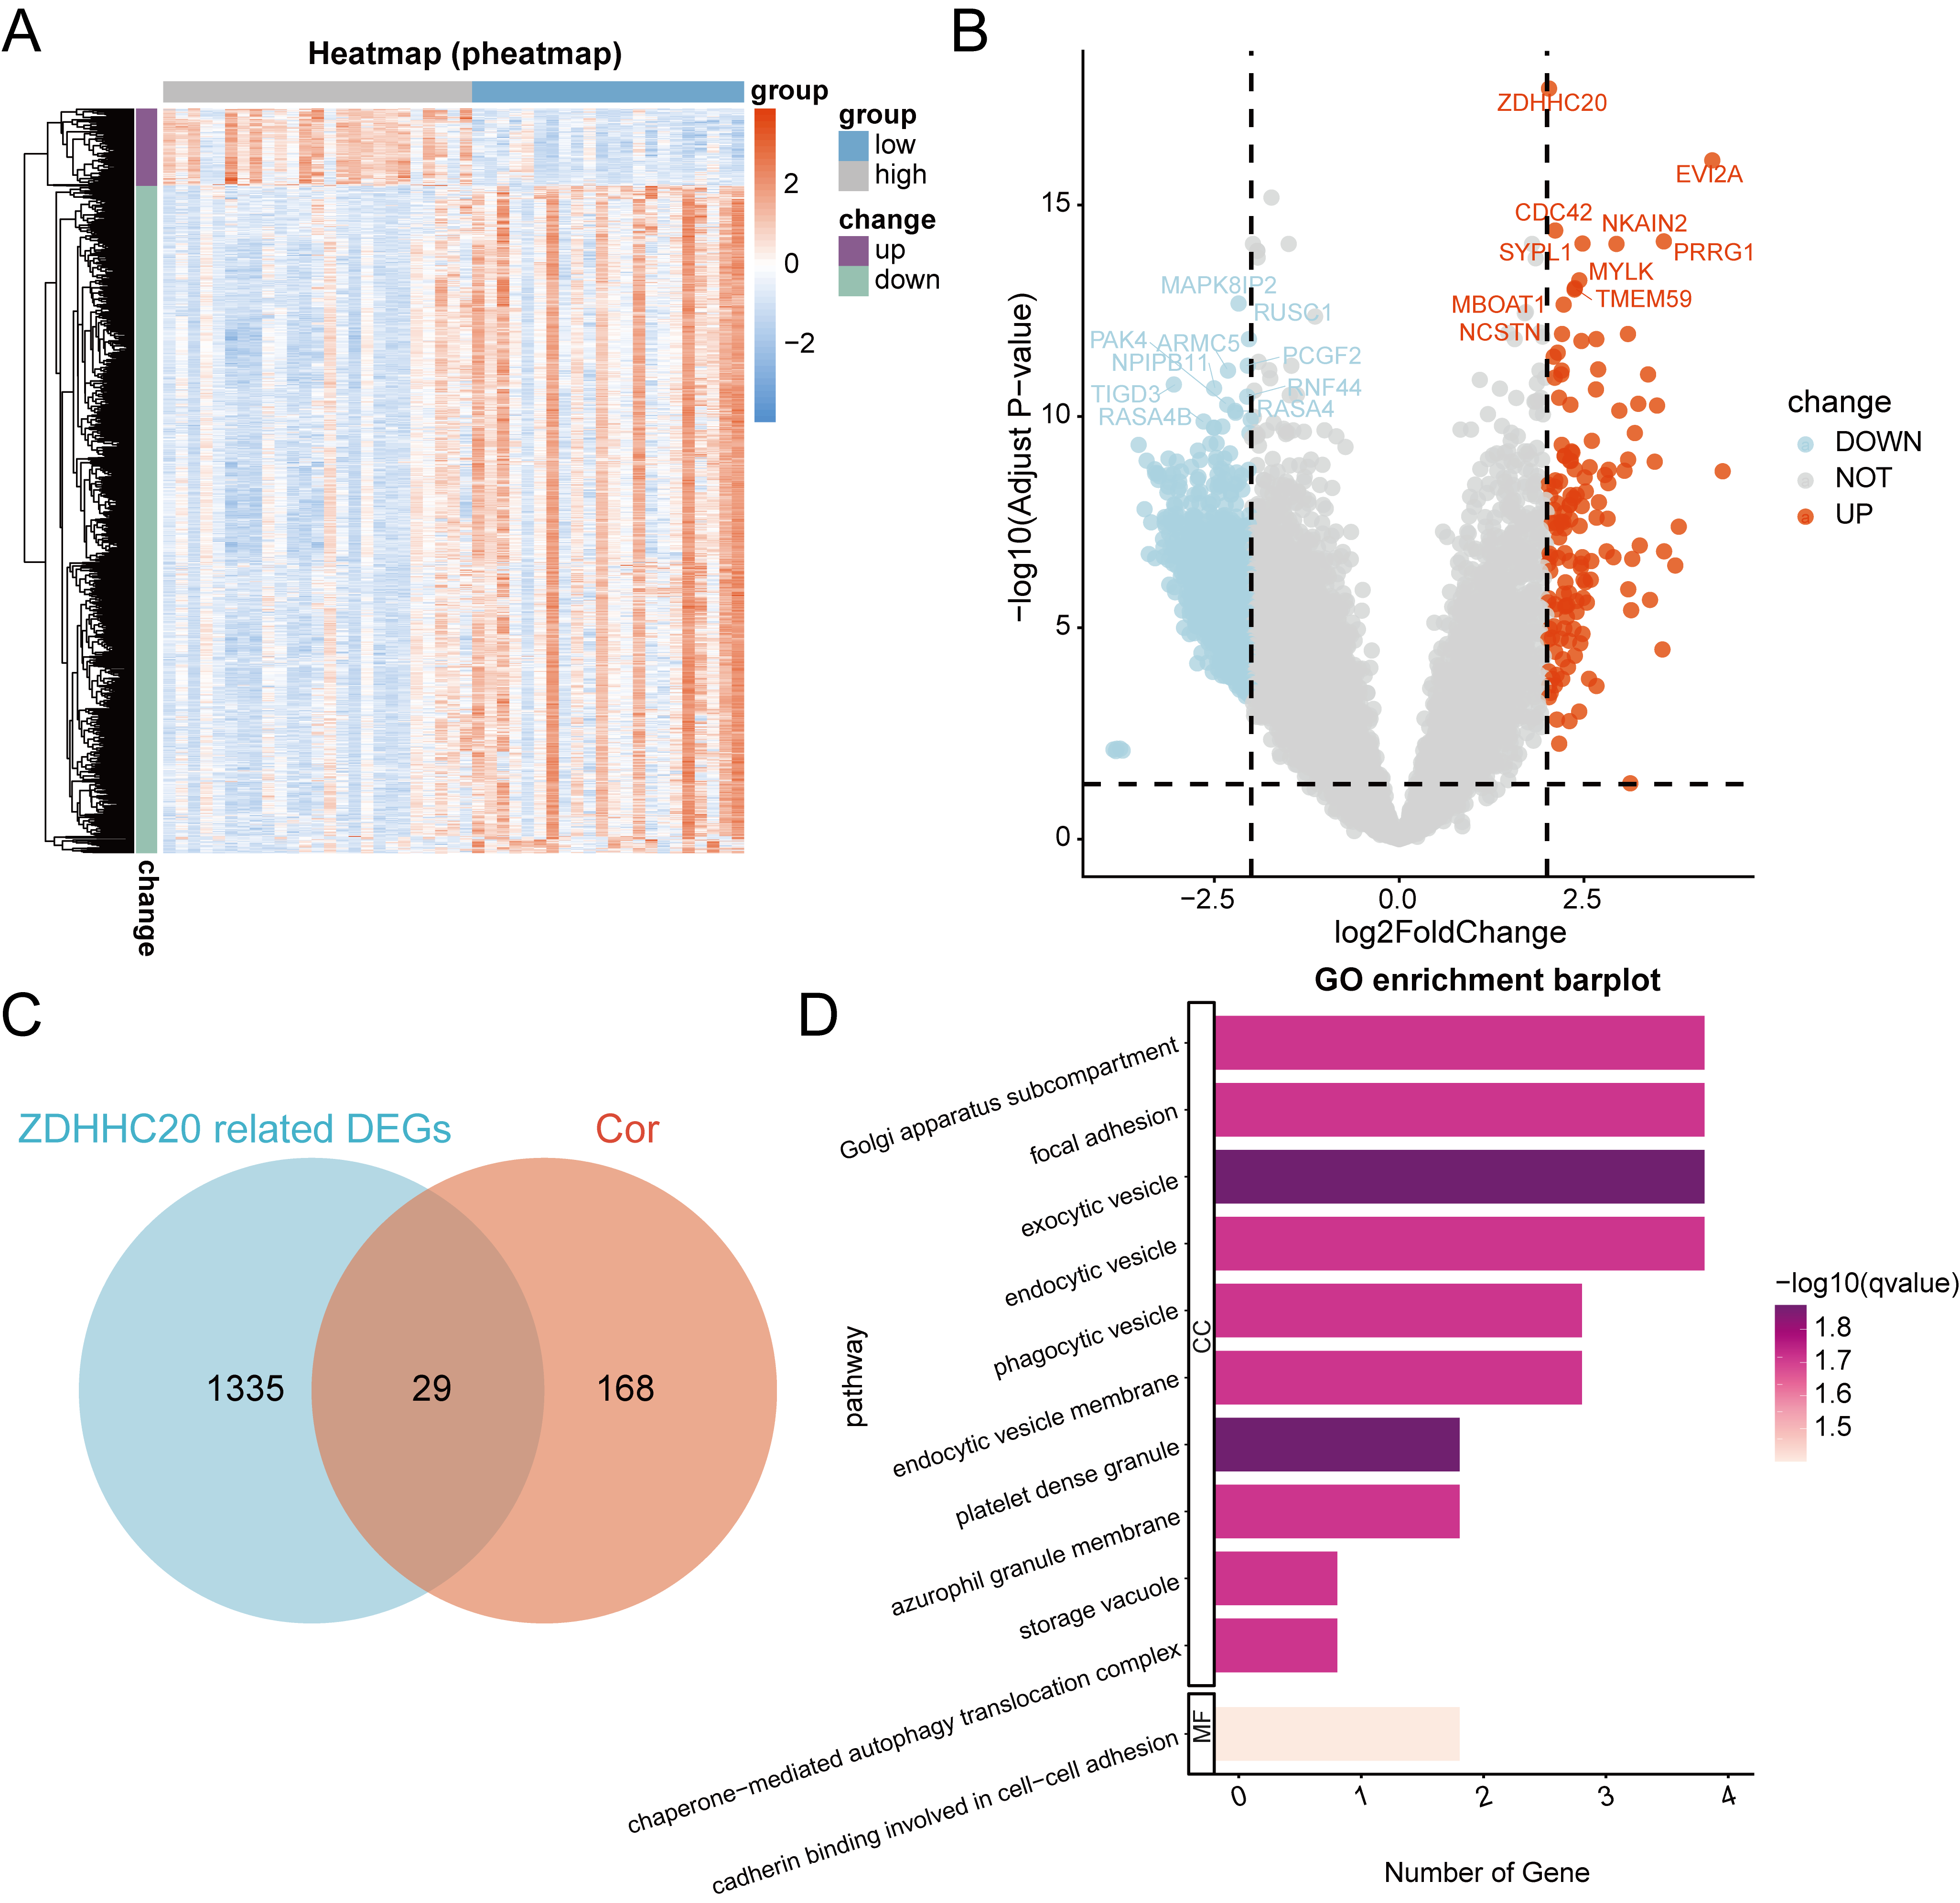


**Fig. S1.** Identification of key ZDHHC20-related genes. **(A)** Heatmap of DEGs between the ZDHHC20 high- and low-expression groups. Red indicates upregulation; blue indicates downregulation. **(B)** Volcano plot of DEGs between the ZDHHC20 high- and low-expression groups. Red and blue dots represent upregulated and downregulated genes, respectively. The top 10 genes are labeled. **(C)** A Venn diagram showing the intersection of ZDHHC20-related DEGs and genes highly correlated with ZDHHC20. **(D)** Functional enrichment analysis of the 29 intersecting key genes. Significantly enriched pathways (q value < 0.05) are displayed. DEGs: Differentially expressed genes.


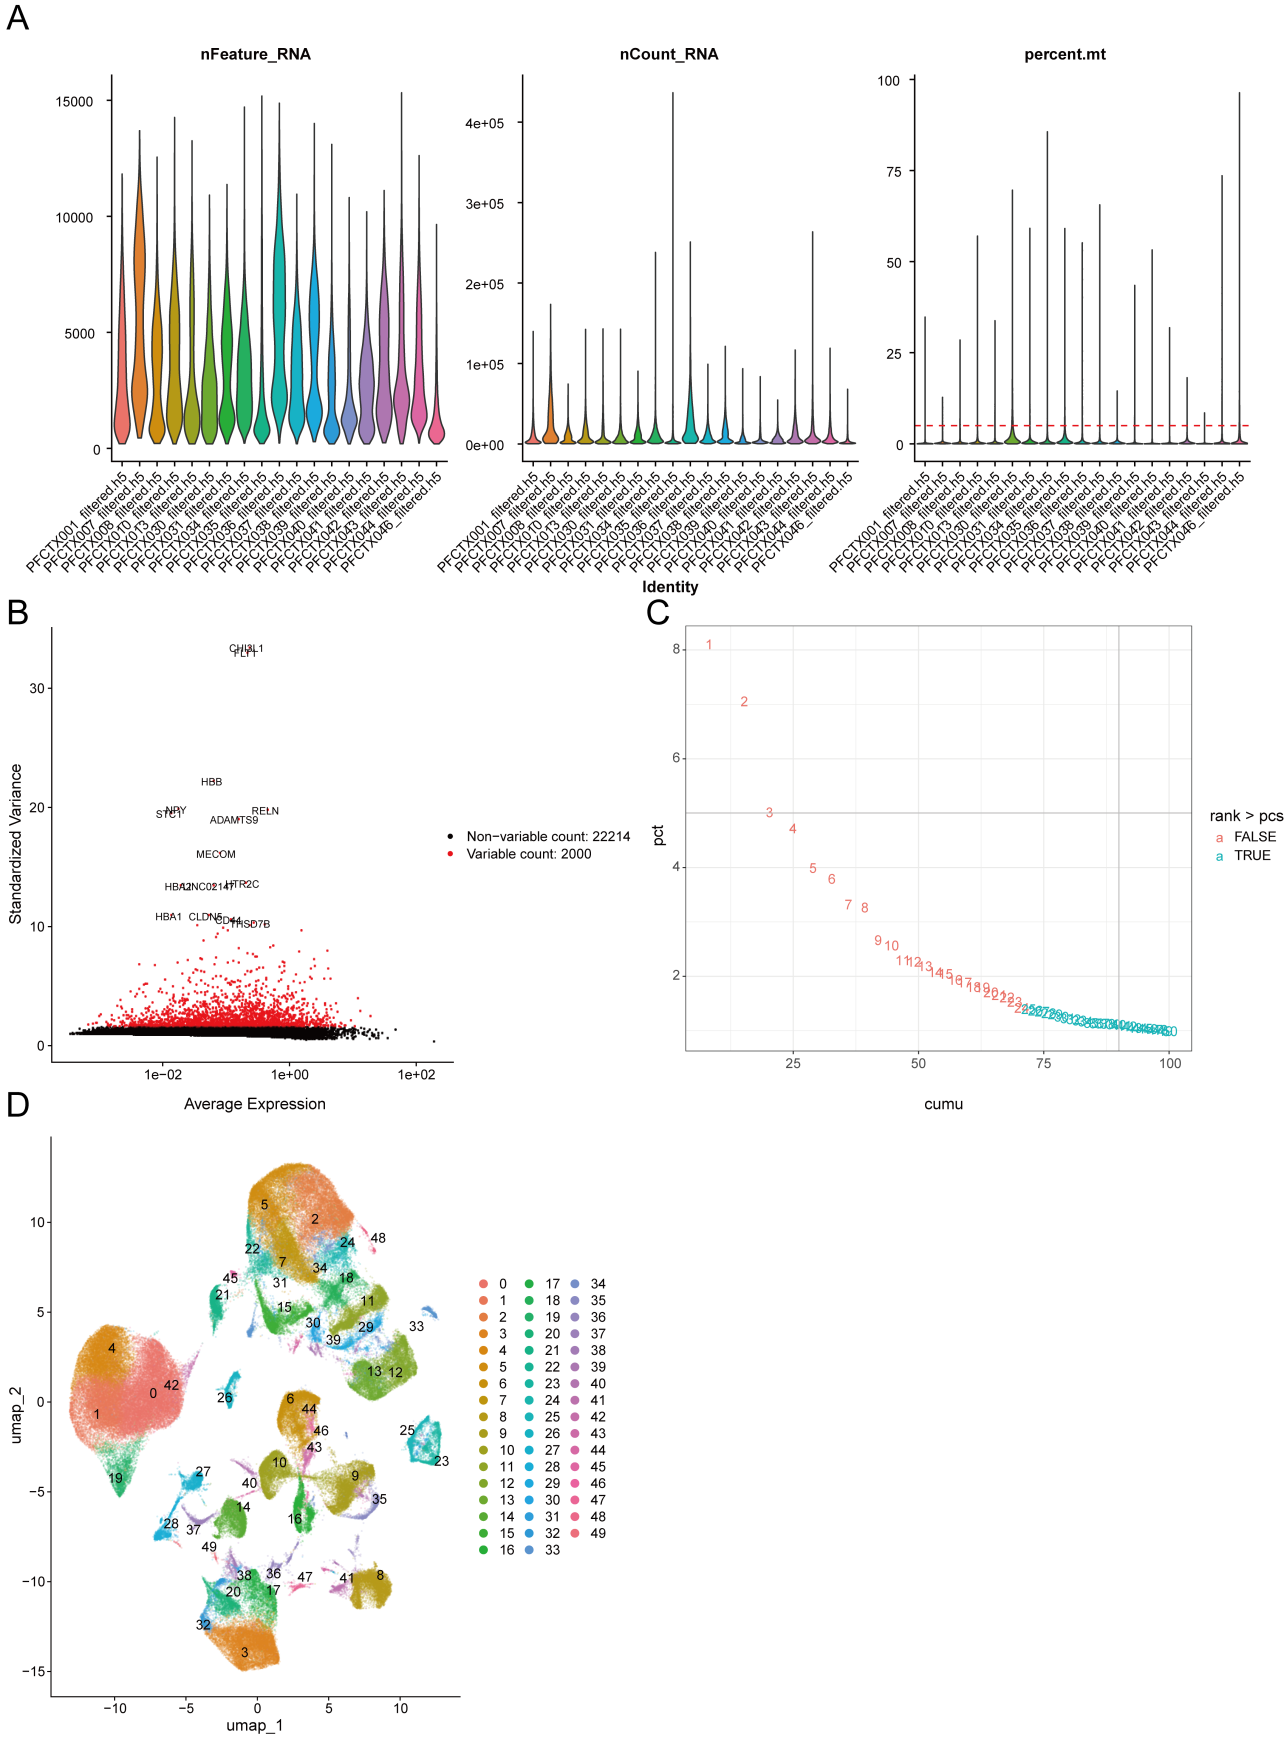


**Fig. S2.** Quality control and dimensionality reduction clustering of single-cell data. **(A)** Quality control of single-nucleus data. **(B)** Top 2000 highly variable genes (HVGs), with red dots representing HVGs and black dots denoting relatively stable genes. **(C)** Elbow plot for determining the optimal dimensions; according to the criteria described in the text, the last number marked in red is considered the inflection point. **(D)** UMAP visualization of single-nucleus data, where each dot represents a cell nucleus and different colors indicate distinct clusters.


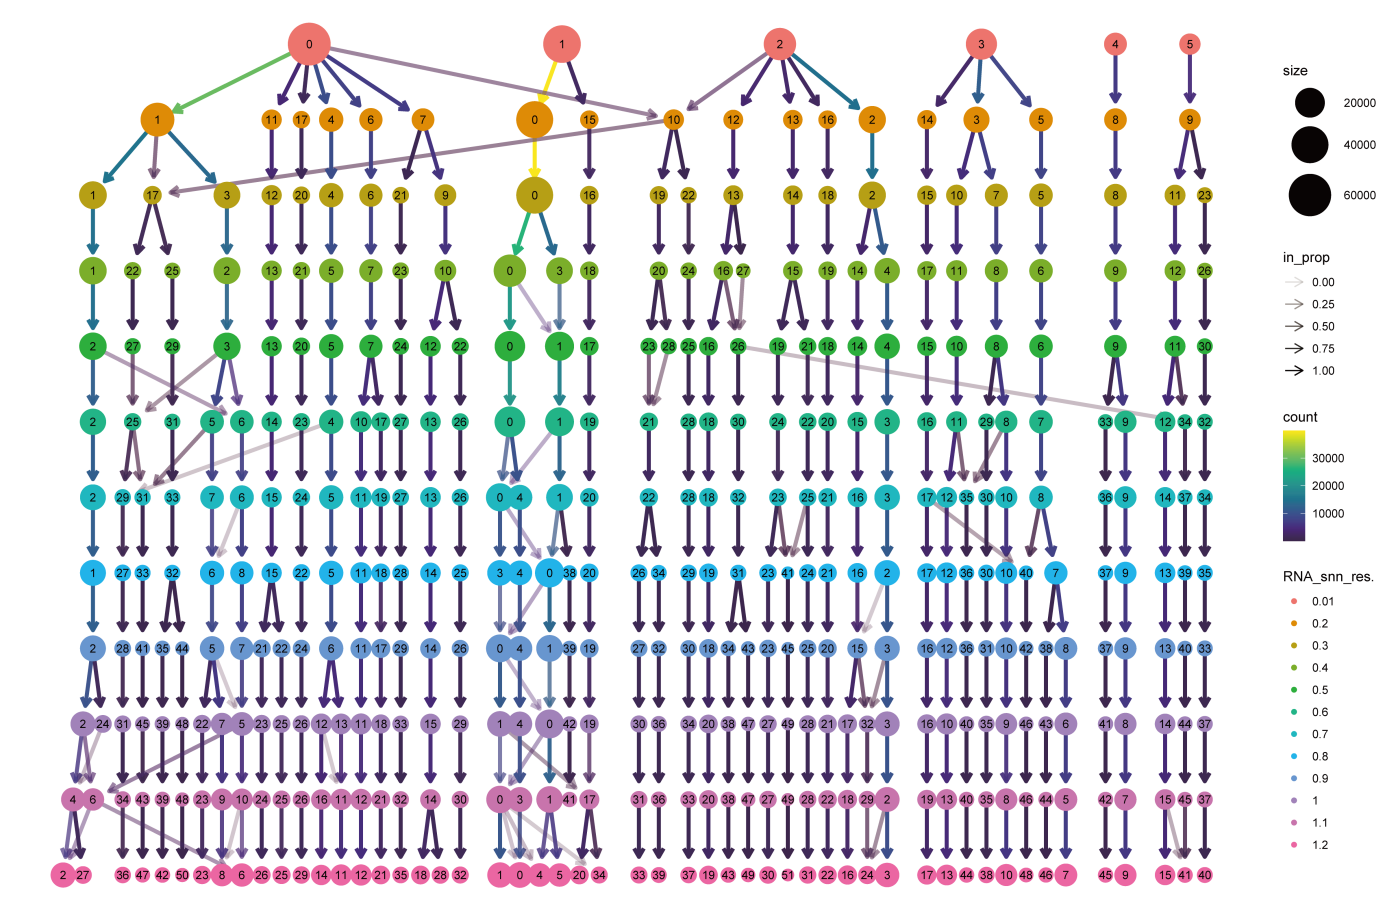


**Fig. S3.** Clustree to select the optimal resolution.


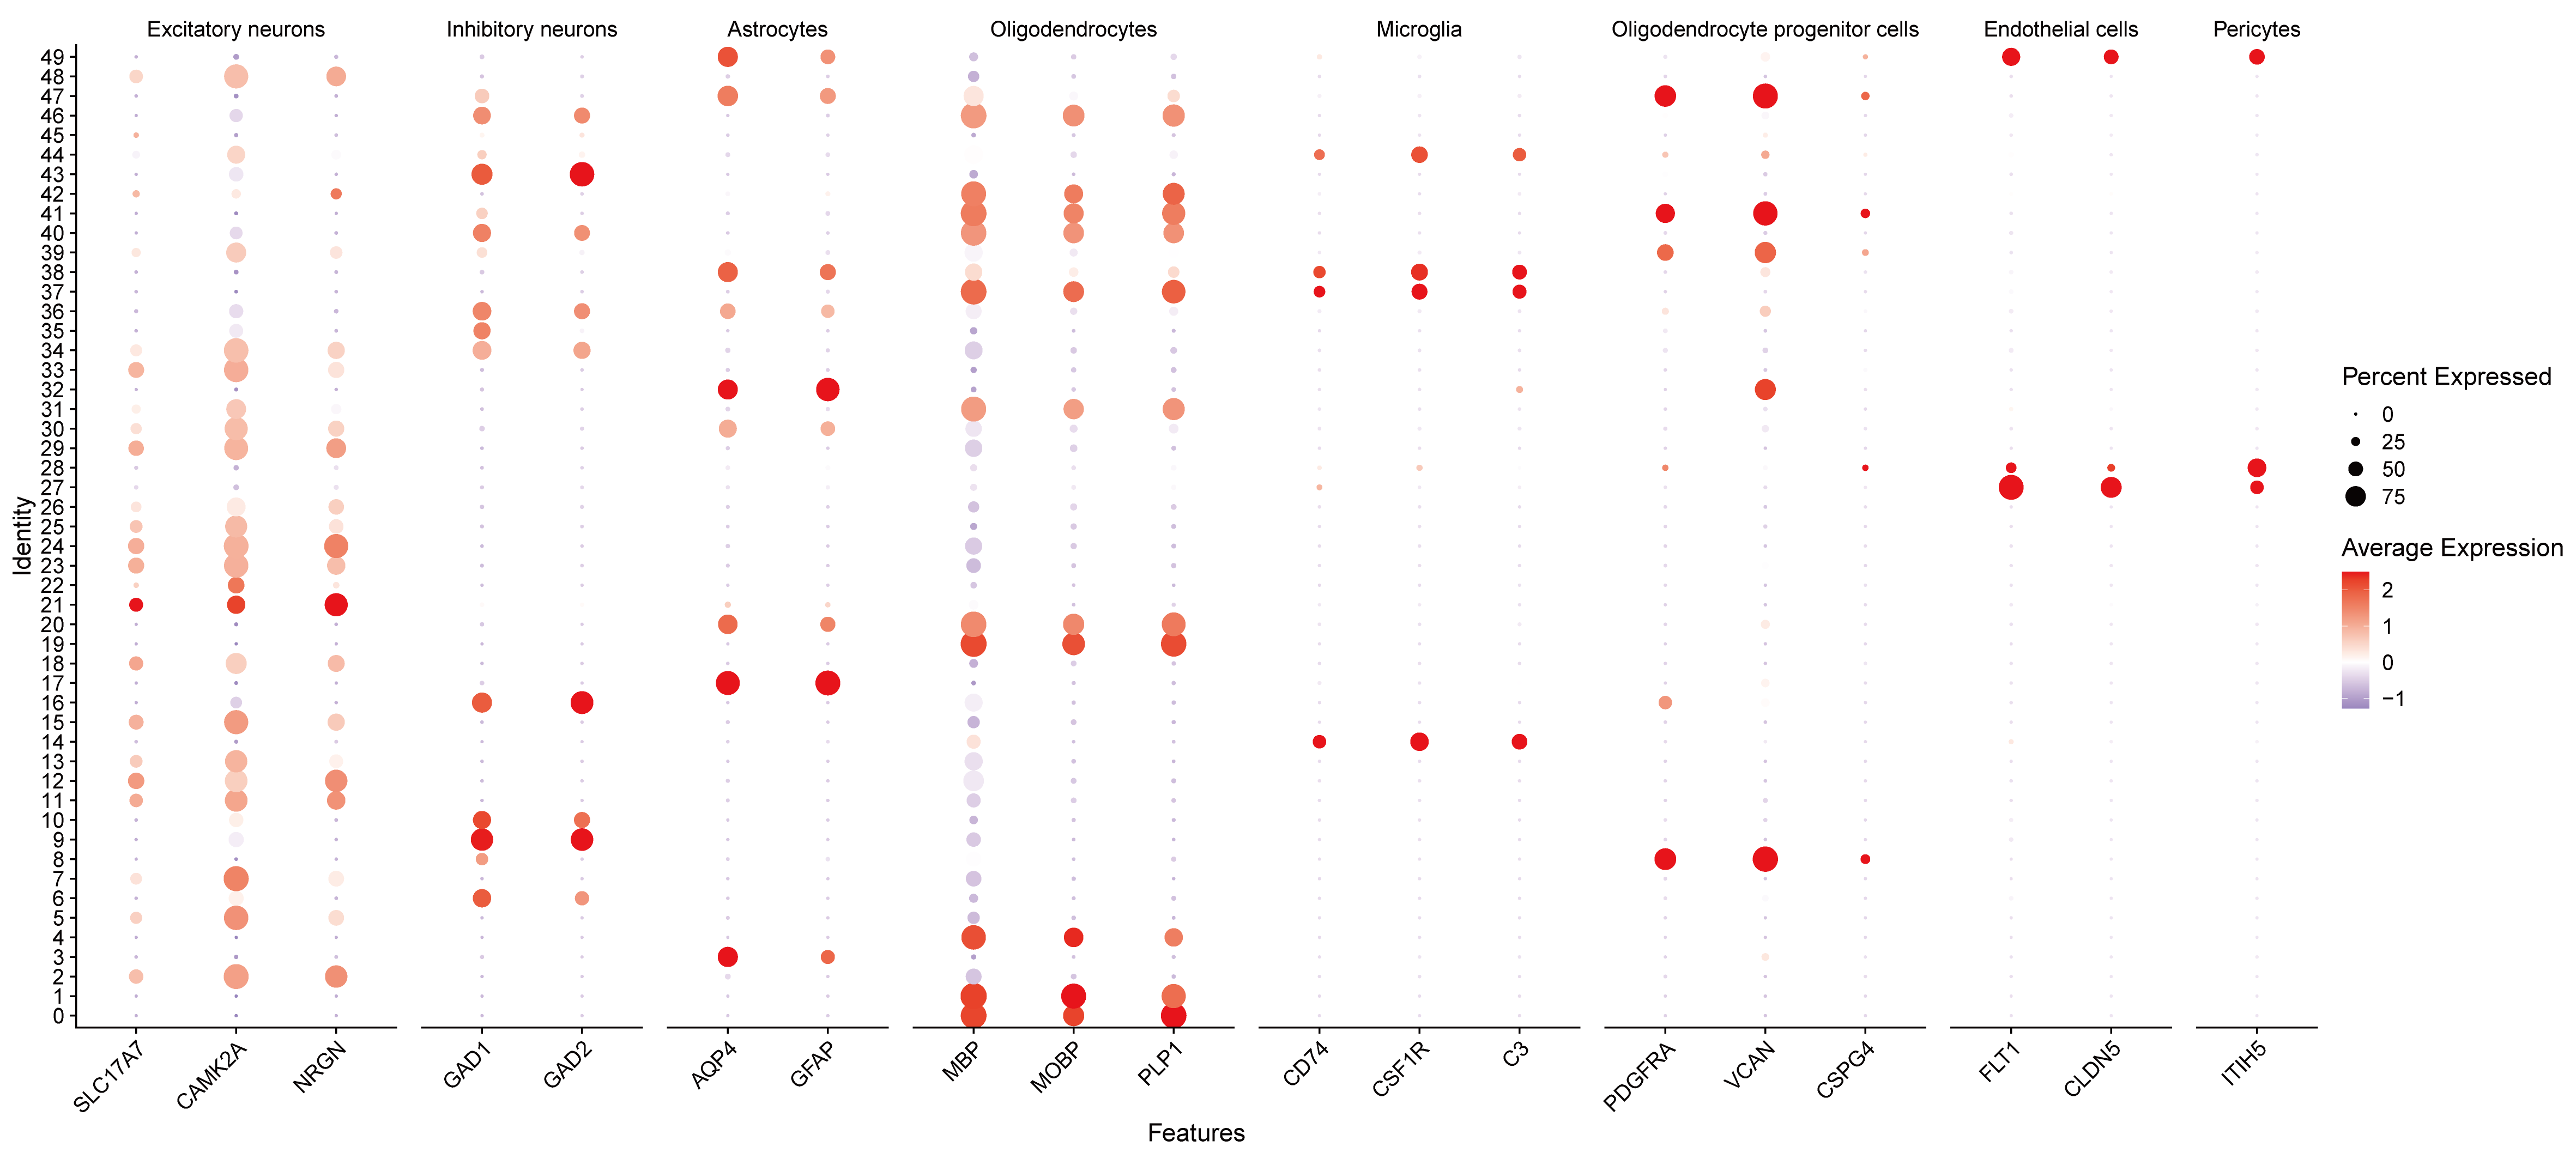


**Fig. S4.** Cell annotation.


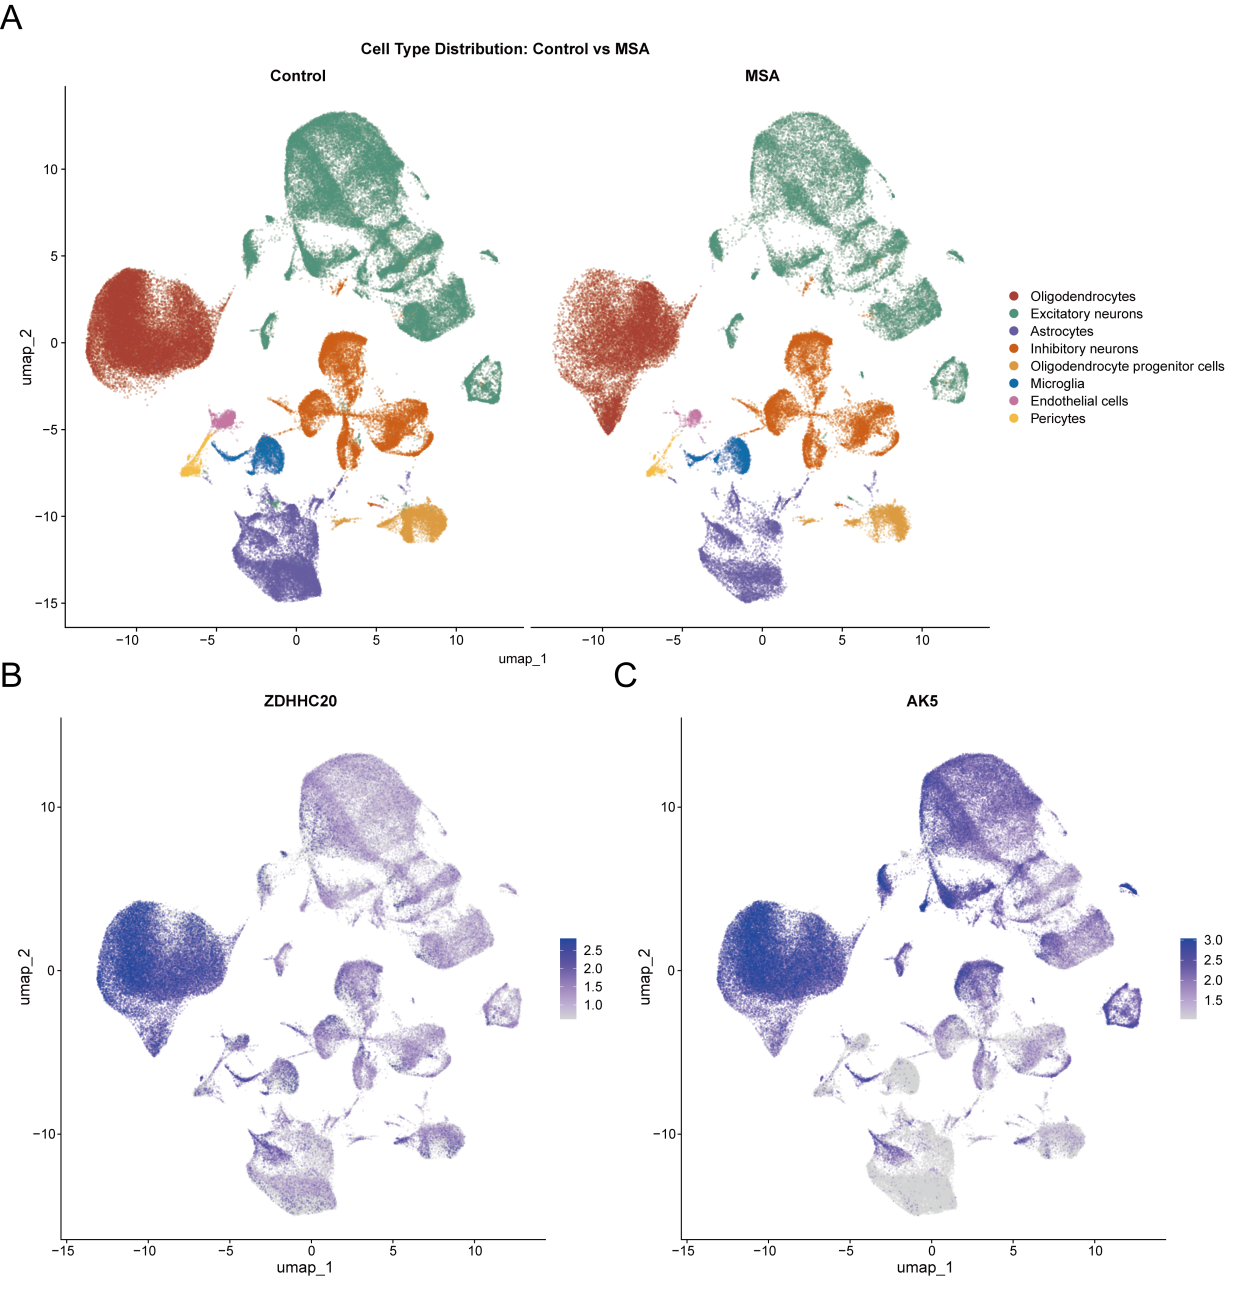


**Fig. S5.**  **(A)** Cellular distribution of MSA and HC. **(B–C)** Distribution of ZDHHC20 and AK5 in cells, with darker color indicating higher expression levels.


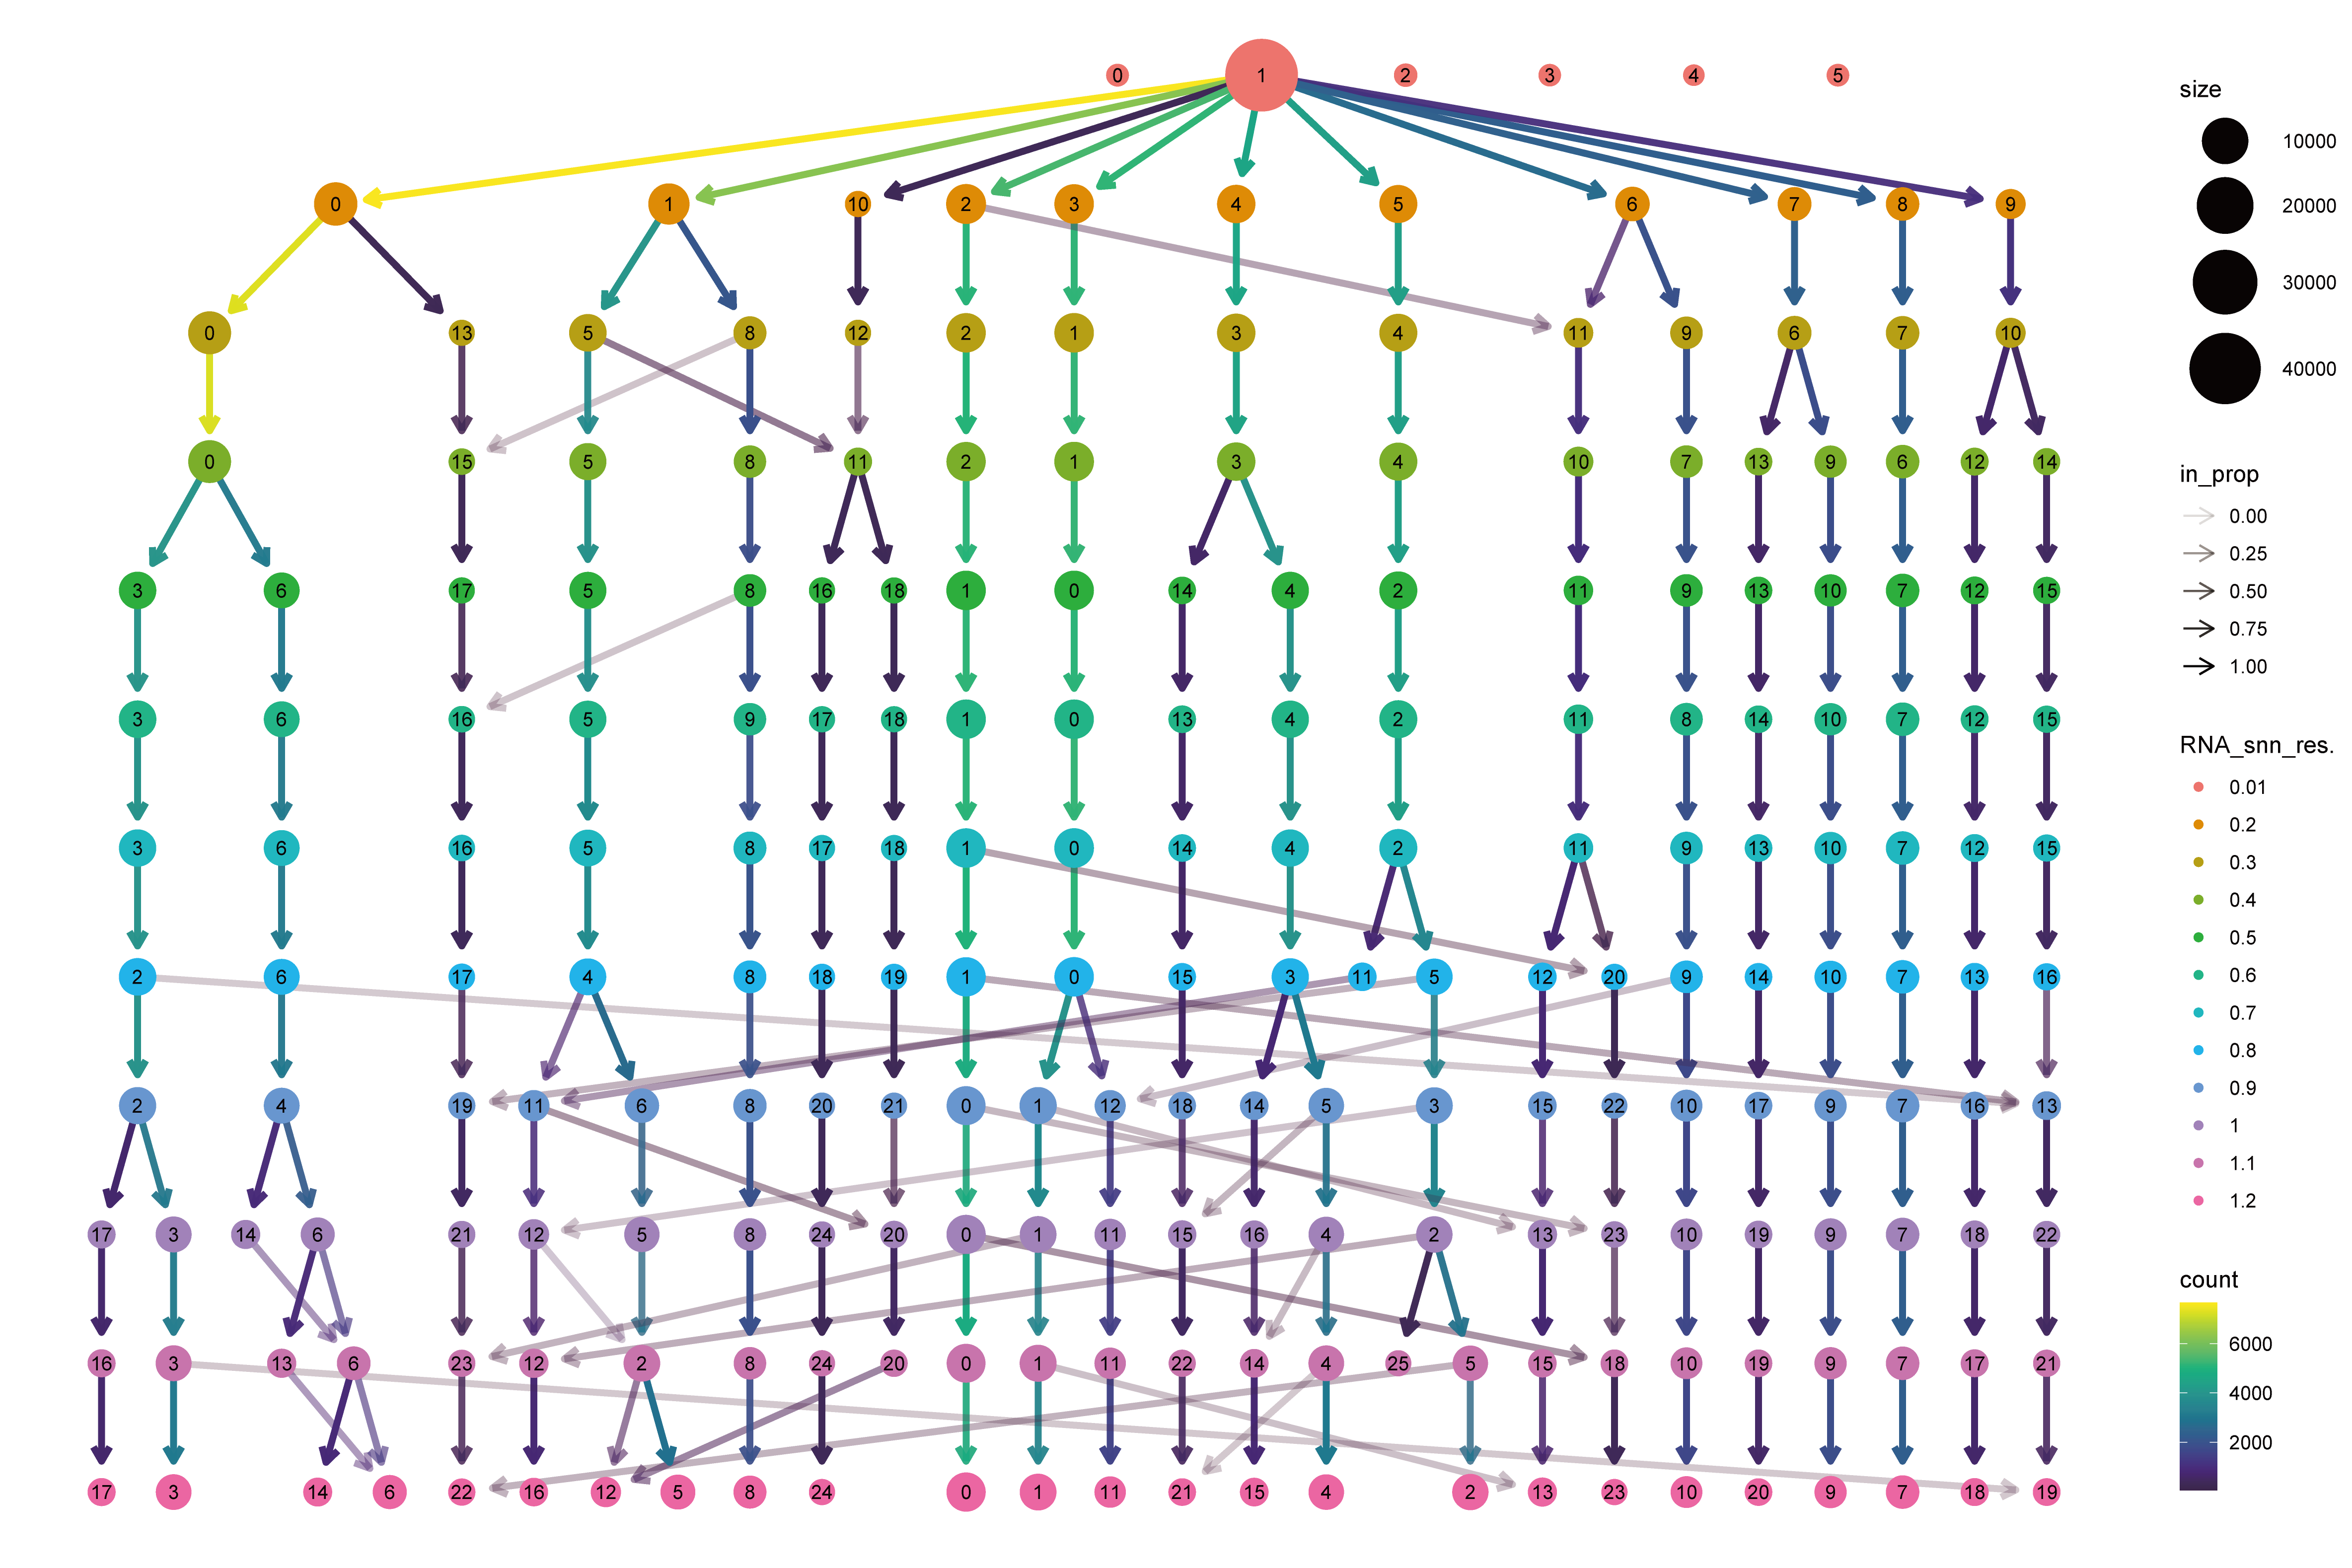


**Fig. S6.** Determining the optimal resolution in oligodendrocyte.


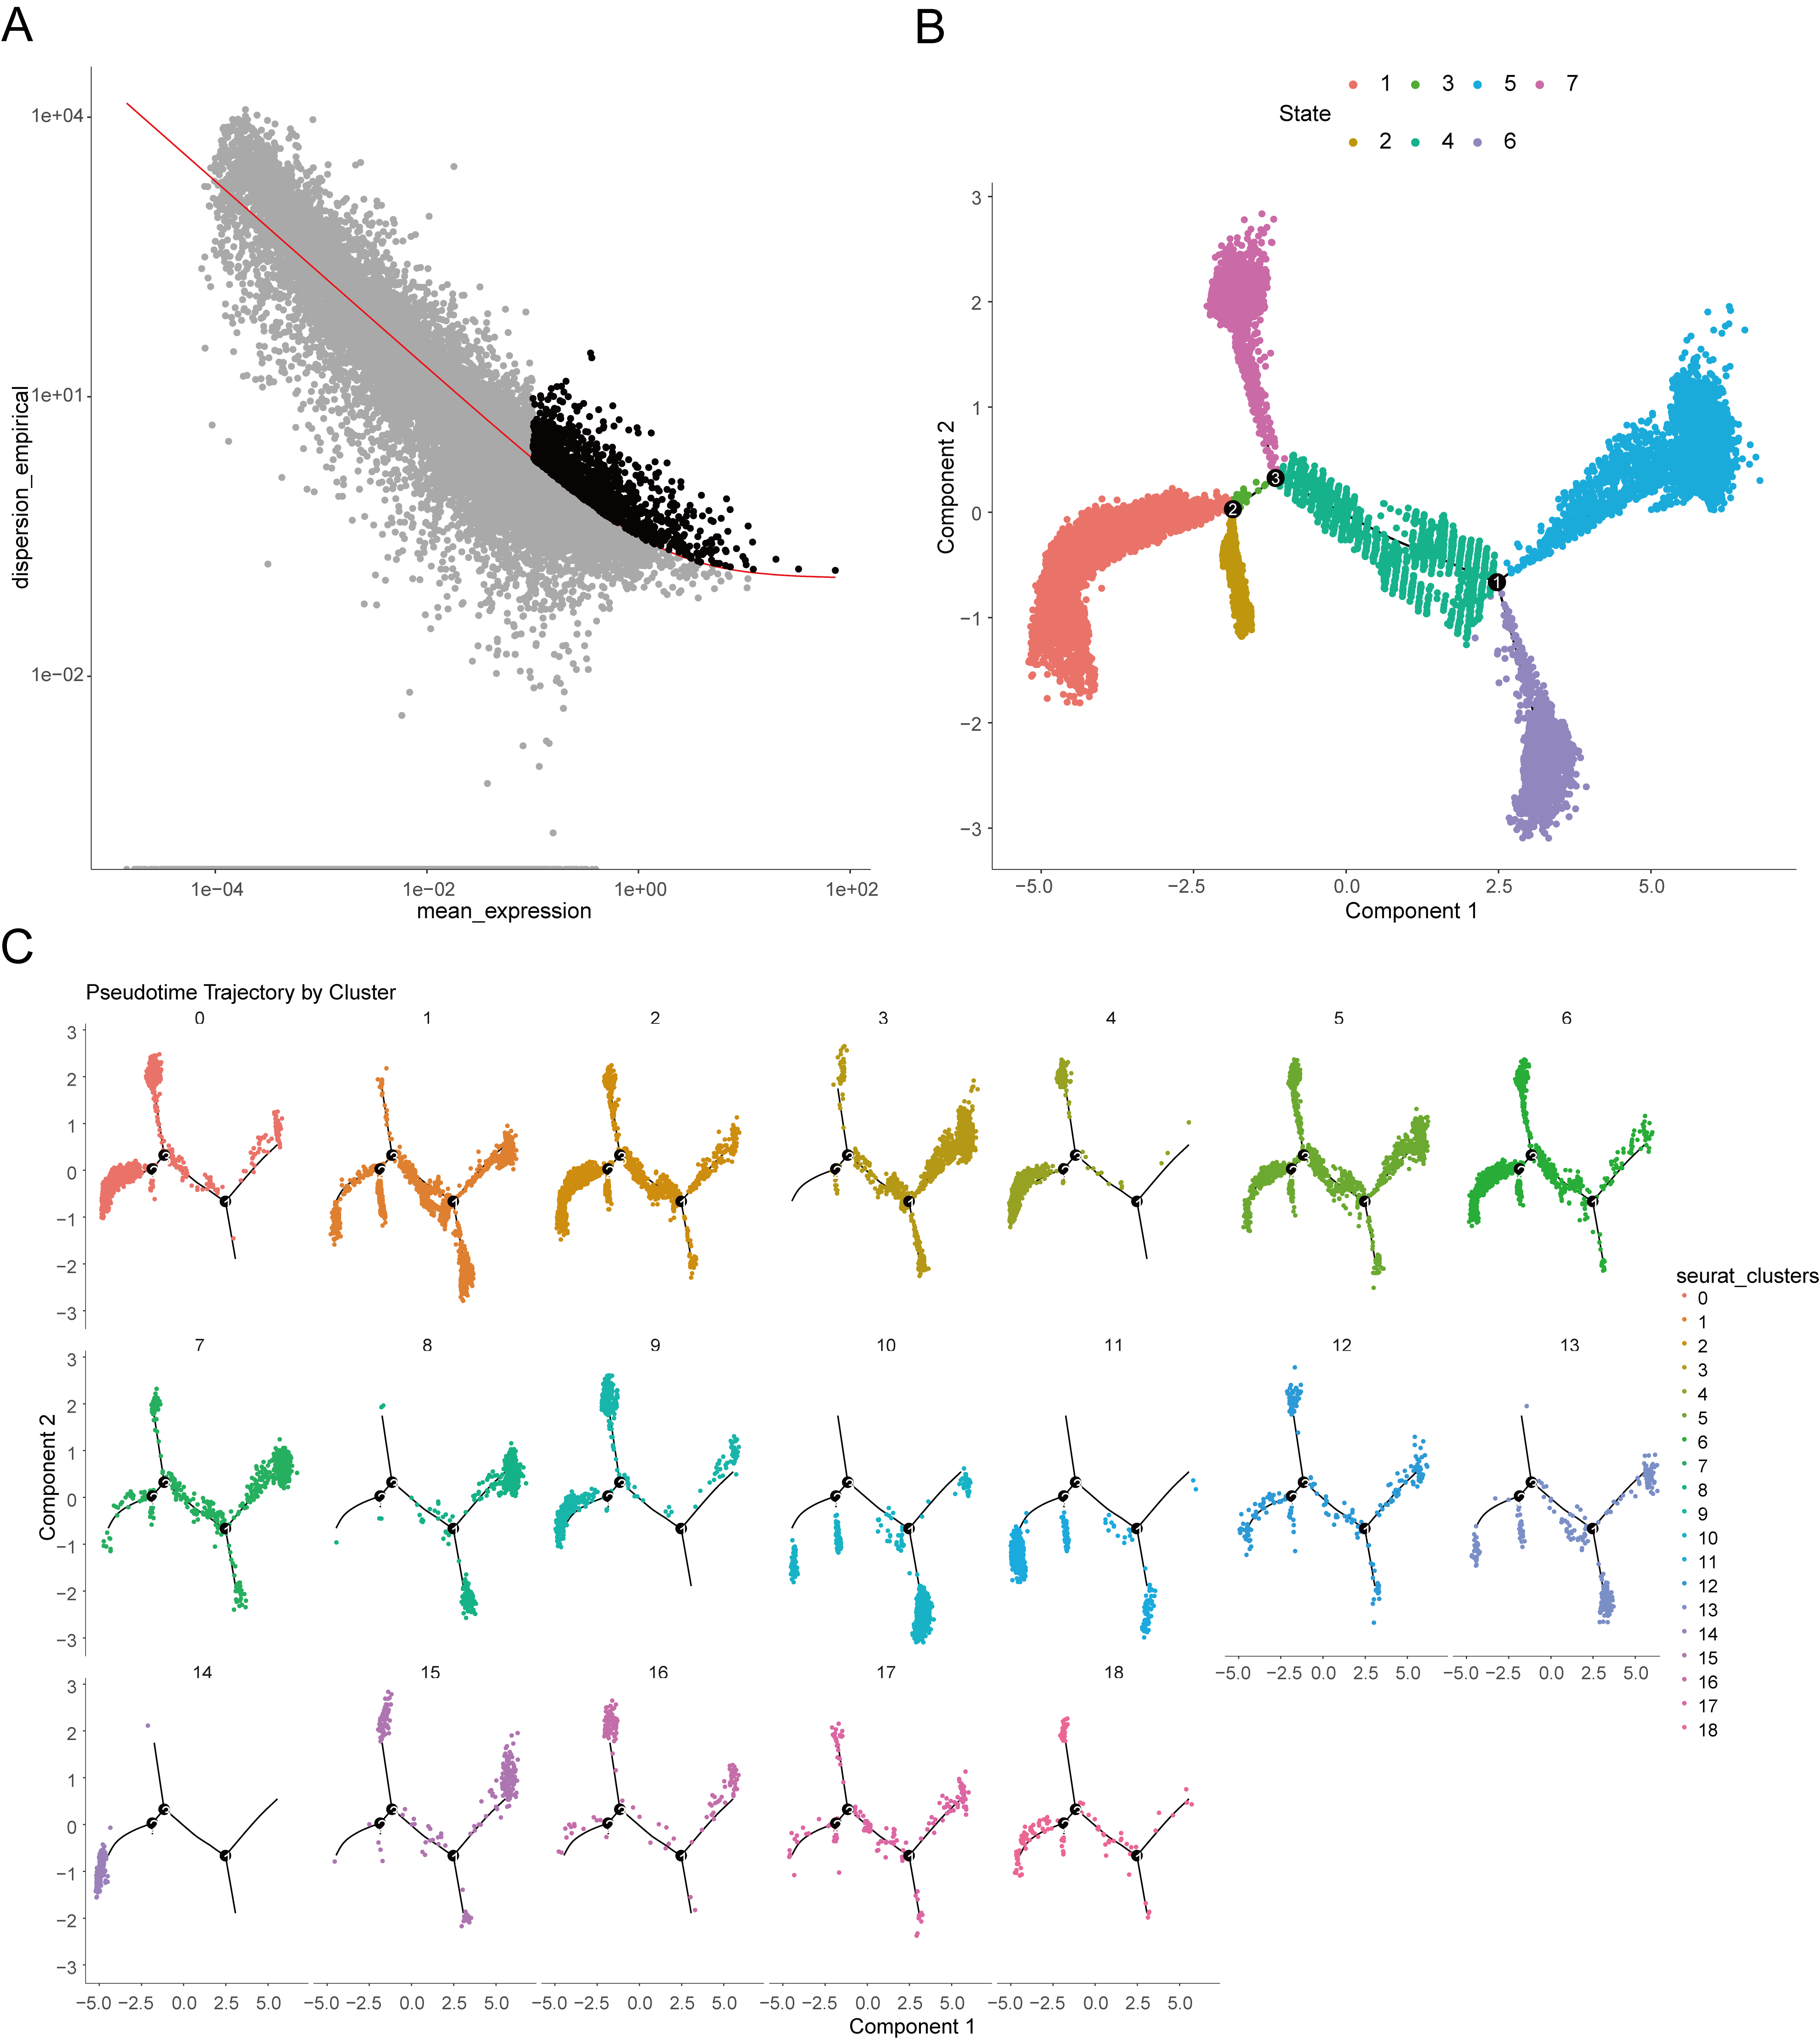


**Fig. S7.**  **(A)** Selection of transcripts (represented by black dots) that meet the criteria for pseudotime analysis. **(B)** Distribution of different states along the pseudotime trajectory. **(C)** Distribution of different clusters on the trajectory.
