# Supplementary material for: Transcriptomic Analysis and Multiple Machine Learning Approaches Identify ZDHHC20 and Its Highly Correlated Gene AK5 as Diagnostic Markers in Multiple System Atrophy
Source: Research Square preprint supplement (doi:10.21203/rs.3.rs-8711800/v1), 2026-02-13
Supplement: Supplementary file 2 [file ef2b0fda26bd1ccd8d460900.xlsx]

## Sheet: Table S1
palmitoylation-regulated genes(PRGs)
ZDHHC1
ZDHHC2
ZDHHC3
ZDHHC4
ZDHHC5
ZDHHC6
ZDHHC7
ZDHHC8
ZDHHC9
ZDHHC11
ZDHHC11B
ZDHHC12
ZDHHC13
ZDHHC14
ZDHHC15
ZDHHC16
ZDHHC17
ZDHHC18
ZDHHC19
ZDHHC20
ZDHHC21
ZDHHC22
ZDHHC23
ZDHHC24
APT1
PORCN
HHAT
HHATL
APT2
PPT1
PPT2
ABHD10
ABHD16A
ABHD17A
ABHD17B
ABHD17C

## Sheet: TableS3
Intersection
SCCPDH
LAMP2
LIPA
TF
TMEM59
SELENOP
SYPL1
NKAIN2
PTPRZ1
PPA2
CDC42
EVI2A
CDKN1C
NCSTN
RAB10
PHAF1
SGK2
PDGFRA
TMEM184C
SLCO1A2
AK5
SH3GL3
MBOAT1
TMEM144
PXK
TNFRSF25
PAK4
PDE4A
ESPN

## Sheet: Table S4
Target lncRNAs predicted based on miRNAs
Source	Target
hsa-miR-134-5p	PINK1-AS
hsa-miR-134-5p	AC104447.1
hsa-miR-134-5p	LINC01618
hsa-miR-134-5p	PP7080
hsa-miR-134-5p	MIR600HG
hsa-miR-134-5p	KCNQ1OT1
hsa-miR-134-5p	NEAT1
hsa-miR-134-5p	Z92544.1
hsa-miR-134-5p	AC005332.6
hsa-miR-134-5p	WDR7-OT1
hsa-miR-134-5p	MIR122HG
hsa-miR-134-5p	AL117335.1
hsa-miR-642b-3p	AC016717.2
hsa-miR-642b-3p	SNHG7
hsa-miR-642b-3p	NEAT1
hsa-miR-642b-3p	HELLPAR
hsa-miR-642b-3p	MIR17HG
hsa-miR-642b-3p	SNHG14
hsa-miR-642b-3p	OIP5-AS1
hsa-miR-642b-3p	SNHG20
hsa-miR-642b-3p	NORAD
hsa-miR-642b-3p	XIST
hsa-miR-642b-3p	LINC00630
hsa-miR-342-3p	AL390728.5
hsa-miR-342-3p	SOX2-OT
hsa-miR-342-3p	AC139887.2
hsa-miR-342-3p	PURPL
hsa-miR-342-3p	CKMT2-AS1
hsa-miR-342-3p	AC021078.1
hsa-miR-342-3p	SNHG7
hsa-miR-342-3p	NUTM2B-AS1
hsa-miR-342-3p	KCNQ1OT1
hsa-miR-342-3p	NEAT1
hsa-miR-342-3p	LINC01089
hsa-miR-342-3p	MEG3
hsa-miR-342-3p	SNHG14
hsa-miR-342-3p	AC016876.2
hsa-miR-342-3p	SNHG16
hsa-miR-342-3p	SNHG20
hsa-miR-342-3p	AC010327.6
hsa-miR-342-3p	MIRLET7BHG
hsa-miR-342-3p	XIST
hsa-miR-653-5p	AC139887.2
hsa-miR-653-5p	SNHG7
hsa-miR-653-5p	NEAT1
hsa-miR-653-5p	OIP5-AS1
hsa-miR-653-5p	MIR122HG
hsa-miR-653-5p	NORAD
hsa-miR-653-5p	XIST
hsa-miR-548o-3p	SOX2-OT
hsa-miR-548o-3p	MIR600HG
hsa-miR-548o-3p	KCNQ1OT1
hsa-miR-548o-3p	NEAT1
hsa-miR-548o-3p	LINC01089
hsa-miR-548o-3p	MIR17HG
hsa-miR-548o-3p	MEG3
hsa-miR-548o-3p	SNHG14
hsa-miR-548o-3p	OIP5-AS1
hsa-miR-548o-3p	Z92544.1
hsa-miR-548o-3p	AC016876.2
hsa-miR-548o-3p	SNHG20
hsa-miR-6509-3p	PURPL
hsa-miR-6509-3p	NUTM2B-AS1
hsa-miR-6509-3p	KCNQ1OT1
hsa-miR-6509-3p	HELLPAR
hsa-miR-6509-3p	SNHG14
hsa-miR-6509-3p	XIST
hsa-miR-6509-3p	LINC00630
hsa-miR-2114-5p	PP7080
hsa-miR-2114-5p	KCNQ1OT1
hsa-miR-2114-5p	MEG3
hsa-miR-2114-5p	SNHG14
hsa-miR-2114-5p	AC016876.2
hsa-miR-2114-5p	SNHG16
hsa-miR-2114-5p	WDR7-OT1
hsa-miR-2114-5p	XIST
hsa-miR-30d-5p	AL390728.5
hsa-miR-30d-5p	AC016717.2
hsa-miR-30d-5p	AC104447.1
hsa-miR-30d-5p	AC021078.1
hsa-miR-30d-5p	NEAT1
hsa-miR-30d-5p	LINC01089
hsa-miR-30d-5p	SNHG14
hsa-miR-30d-5p	OIP5-AS1
hsa-miR-30d-5p	NORAD
hsa-miR-30d-5p	XIST
hsa-miR-642b-5p	KCNQ1OT1
hsa-miR-642b-5p	Z92544.1
hsa-miR-642b-5p	AL117335.1
hsa-miR-642b-5p	MIRLET7BHG
hsa-miR-642b-5p	XIST
hsa-miR-3200-5p	KCNQ1OT1
hsa-miR-3200-5p	NEAT1
hsa-miR-3200-5p	SNHG14
hsa-miR-3200-5p	AC005332.6
hsa-miR-3200-5p	MIR122HG
hsa-miR-3200-5p	XIST
hsa-miR-20b-5p	PINK1-AS
hsa-miR-20b-5p	AC139887.2
hsa-miR-20b-5p	LINC01618
hsa-miR-20b-5p	CKMT2-AS1
hsa-miR-20b-5p	AC021078.1
hsa-miR-20b-5p	KCNQ1OT1
hsa-miR-20b-5p	NEAT1
hsa-miR-20b-5p	SNHG14
hsa-miR-20b-5p	OIP5-AS1
hsa-miR-20b-5p	SNHG16
hsa-miR-20b-5p	SNHG20
hsa-miR-20b-5p	AC010327.6
hsa-miR-20b-5p	NORAD
hsa-miR-20b-5p	XIST
